# Supplementary material
Source: publisher site journal article supplement (http://www.kjim.org/upload/media/kjim-2022-183-Supplementary-Fig-5.pdf)
Supplement: Supplementary file 1 [file kjim-2022-183-Supplementary-Fig-5.pdf]

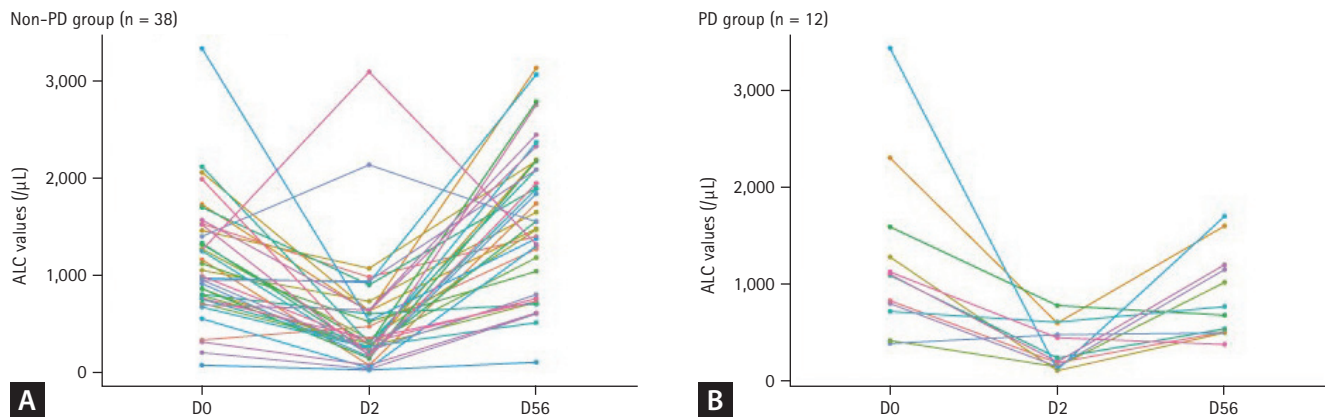

**Supplementary Figure 5.** Paired plots depicting the change in absolute lymphocyte count (ALC) values during the first two cycles of daratumumab therapy in each patient based on their treatment response. (A) Non-progressive disease (PD) group, (B) PD group.
